# Supplementary material for: RadB acts in homologous recombination in the archaeon Haloferax volcanii, consistent with a role as recombination mediator
Source: PubMed Central journal article supplement (PMC5480776; doi:10.1016/j.dnarep.2017.04.005), 2017-07

# A

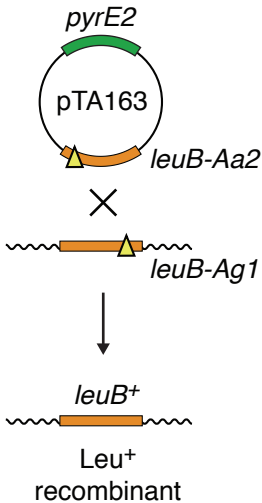

Supplement: mmc1.pdf [file mmc1.pdf]
