# Supplementary material for: RadB acts in homologous recombination in the archaeon Haloferax volcanii, consistent with a role as recombination mediator
Source: PubMed Central journal article supplement (PMC5480776; doi:10.1016/j.dnarep.2017.04.005), 2017-07
Supplement: mmc2.pdf [file mmc2.pdf]

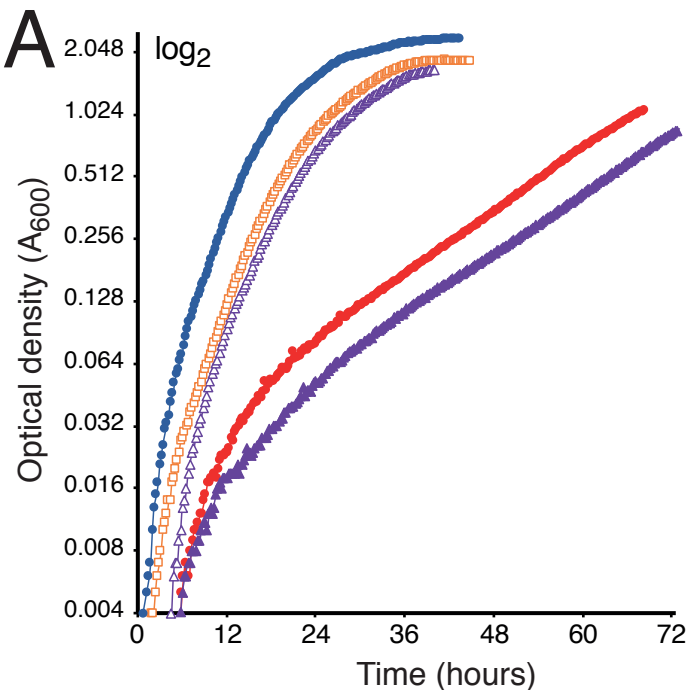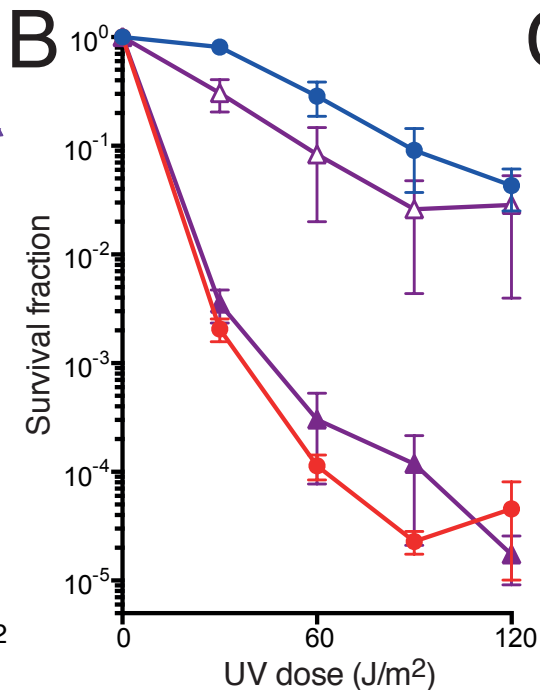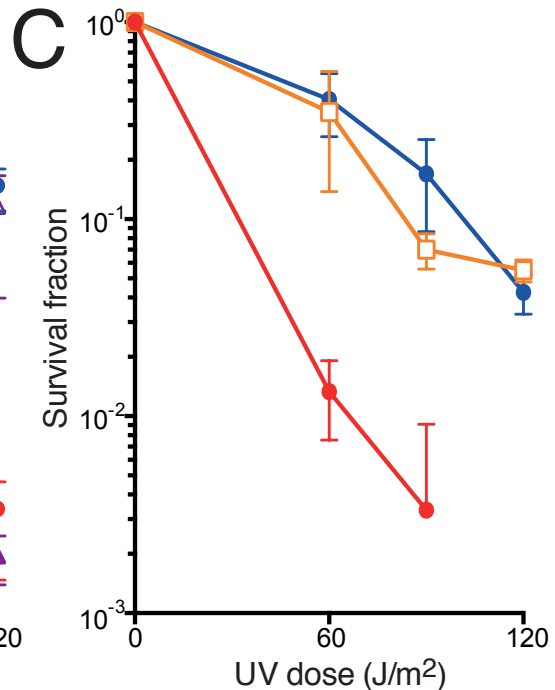

- H26 (*radB*<sup>+</sup>) 2.0 hours
- H64 (*radB* $\Delta b/b$ ) 6.25 hours
- ▲ H187 ( $\Delta hjc$  *radB* $\Delta b/b$ ) 7.75 hours
- ▲ H188 ( $\Delta hjc$  *radB* $\Delta b/b$  *radA-A196V*) 2.25 hours
- H1309 (*radB* $\Delta b/b$  *radA-S101P*) 2.5 hours
